# Supplementary material for: The Presence of Four Pathogenic Oral Bacterial Species in Six Wild Snake Species from Southern Taiwan: Associated Factors
Source: MDPI journal article supplement (doi:10.3390/microorganisms12020263), 2024-01-26
Supplement: s1 [file s1]

## Supplementary Materials:

**Table S1.** Microorganisms previously documented in the literature as associated with secondary infections resulting from snake bites [8,23,44,46,73,80-83].

| Aerobic Bacteria                   |                                 | Anaerobic Bacteria                |
|------------------------------------|---------------------------------|-----------------------------------|
| Gram-positive                      | Gram-negative                   |                                   |
| <i>Bacillus subtilis</i>           | <i>Aeromonas hydrophila</i>     | <i>Bacteroides fragilis</i>       |
| <i>Bacillus megaterium</i>         | <i>Bordetella</i> species       | <i>Clostridium perfringens</i>    |
| <i>Bacillus thuringiensis</i>      | <i>Citrobacter freundii</i>     | <i>Clostridium sporogenes</i>     |
| <i>Bacillus cereus</i>             | <i>Citrobacter amalonaticus</i> | <i>Cetobacterium</i> species      |
| <i>Corynebacterium diphtheriae</i> | <i>Chryseobacterium</i> species | <i>Clostridium</i> species        |
| <i>Enterococcus</i> species        | <i>Escherichia coli</i>         | <i>Peptostreptococcus</i> species |
| <i>Lactococcus lactis</i>          | <i>Enterobacter aerogenes</i>   |                                   |
| <i>Micrococcus luteus</i>          | <i>Klebsiella pneumoniae</i>    |                                   |
| <i>Micrococcus glutamicus</i>      | <i>Morganella morganii</i>      |                                   |
| <i>Rhodococcus</i> species         | <i>Proteus vulgaris</i>         |                                   |
| <i>Staphylococcus aureus</i>       | <i>Proteus mirabilis</i>        |                                   |
| <i>Strptococcus</i> species        | <i>Providencia rettgeri</i>     |                                   |
| <i>Vagococcus</i> species          | <i>Pseudomonas aeruginosa</i>   |                                   |
|                                    | <i>Salmonella typhi</i>         |                                   |
|                                    | <i>Serratia marcescens</i>      |                                   |
|                                    | <i>Serratia liquefaciens</i>    |                                   |
|                                    | <i>Salmonella</i> species       |                                   |
|                                    | <i>Stenotrophomonas</i> species |                                   |
|                                    | <i>Shewanella</i> species       |                                   |
|                                    | <i>Vibrio cholera</i>           |                                   |
|                                    | <i>Yersinia enterocolitica</i>  |                                   |
